# Supplementary material
Source: PubMed Central journal article supplement (PMC8208499)
Supplement: cri_41_5_351_esm1.pdf [file cri_41_5_351_esm1.pdf]

**Electronic Supplementary Material 1: Evaluation questionnaire items\***

| <b>Questionnaire items</b>                                                                  | <b>Description</b>                                                                                                                                                                    |
|---------------------------------------------------------------------------------------------|---------------------------------------------------------------------------------------------------------------------------------------------------------------------------------------|
| A1-A6: perceived changes in knowledge, skills and confidence                                | Perceived sufficiency of knowledge, skills and confidence in relation to suicide bereavement – completed pre-/post-training                                                           |
| B1-B15: usefulness of training activities/tasks                                             | Perceived usefulness of specific training activities (i.e. relevance and advancing understanding)                                                                                     |
| C1-C5: quality/ usefulness of training materials                                            | Views on quality/usefulness of training materials and likelihood of future use                                                                                                        |
| D1-D5: quality of training delivery                                                         | Degree to which attendees' expectations were met for training design, facilitation and objectives                                                                                     |
| E1-E6: quality/effectiveness of facilitators                                                | Perceived effectiveness of facilitators (i.e. preparedness, receptiveness to questions, use of audio-visual materials, creation of supportive environment, encouraging participation) |
| F1-F6: changes in knowledge, concerns, motivations and intentions to change future practice | Perceived extent to which training advanced understanding, motivation and intention to change practice (numerical response scales, values from -3 to +3)                              |
| G1-G3: recommendations to others                                                            | Recommendations and preferences for workshop/online training                                                                                                                          |
| H1-H5: overall usefulness of training                                                       | Free-text items to record most/least useful aspects of training, gaps in information, likelihood of changing practice post-training and general comments                              |

\*Full questionnaire available from corresponding author on request
