# Supplementary material
Source: PubMed Central journal article supplement (PMC8208499)
Supplement: cri_41_5_351_esm2.pdf [file cri_41_5_351_esm2.pdf]

**Electronic Supplementary Material 2. Delegates by professional group (n=62) and gender (38 female/24 male)**

| Professional group   | <i>n</i> | (%)    |
|----------------------|----------|--------|
| Nursing              | 20       | (32.3) |
| Psychology           | 2        | (3.2)  |
| Psychiatry           | 3        | (4.8)  |
| Social Work          | 6        | (9.7)  |
| General Practitioner | 7        | (11.3) |
| Paediatrician        | 4        | (6.5)  |
| Therapy/counselling* | 7        | (11.3) |
| Occupational Therapy | 3        | (4.8)  |
| Coroners Officer     | 2        | (3.2)  |
| Police Officer       | 2        | (3.2)  |
| Third Sector**       | 5        | (8.1)  |
| Not stated           | 1        | (1.6)  |

---

*\*including Psychotherapist, CBT Therapist, Counsellor and Psychological Wellbeing Practitioner*

*\*\* including specialist Suicide Bereavement Worker, Support Worker and Charity Coordinator/CEO*
