# Supplementary material
Source: PubMed Central journal article supplement (PMC8208499)
Supplement: cri_41_5_351_esm3.pdf [file cri_41_5_351_esm3.pdf]

**Electronic Supplementary Material 3. Understanding, concerns, motivations and intentions post-training  
(median scores from range -3 to +3 with higher scores indicating positive outcome)**

| Post training items                                                        | Median score    | <i>n</i> |
|----------------------------------------------------------------------------|-----------------|----------|
| <i>Numerical response scale possible range</i>                             | <i>-3 to +3</i> |          |
| My understanding of suicide bereavement has changed                        | 2               | 60       |
| My concerns about meeting families bereaved my suicide have changed        | 2               | 60       |
| I am motivated to find out more about suicide bereavement                  | 3               | 60       |
| I intend to find out more about suicide bereavement in the next 2-3 months | 2               | 60       |
| I feel more motivated to discuss bereavement by suicide with colleagues    | 3               | 60       |
| I intend to make changes to my own practices                               | 3               | 59       |
