# Supplementary material
Source: PubMed Central journal article supplement (PMC8208499)
Supplement: cri_41_5_351_esm4.pdf [file cri_41_5_351_esm4.pdf]

**Electronic Supplementary Material 4. Perceived usefulness of training tasks**

| Task | Content                                                              | Not at all /not<br>very useful<br>% (n) | Neutral / can't<br>remember<br>% (n) | Quite useful /<br>very useful<br>% (n) | Number of<br>Responses<br>(max =62) |
|------|----------------------------------------------------------------------|-----------------------------------------|--------------------------------------|----------------------------------------|-------------------------------------|
| 1.   | Who is affected when someone dies?                                   | 0 (0)                                   | 6.6 (4)                              | 93.4 (57)                              | 61                                  |
| 2.   | What's in a word                                                     | 0 (0)                                   | 3.3 (2)                              | 96.7 (59)                              | 61                                  |
| 3.   | If a patient dies by suicide                                         | 0 (0)                                   | 14.8 (9)                             | 85.3 (52)                              | 61                                  |
| 4.   | GP Perspective                                                       | 3.3 (2)                                 | 8.2 (5)                              | 88.5 (54)                              | 61                                  |
| 5.   | Suicide Liaison Officer's perspective                                | 0 (0)                                   | 22.0 (9)                             | 78.0 (32)                              | 41                                  |
| 6a.  | Shirley and Dean's experience of early bereavement                   | 0 (0)                                   | 0 (0)                                | 100 (60)                               | 60                                  |
| 6b.  | Shirley and Dean's perception of support they received from their GP | 0 (0)                                   | 1.9 (1)                              | 98.1 (53)                              | 54                                  |
| 7.   | GP's perspective of supporting Shirley and Dean                      | 0 (0)                                   | (0)                                  | 100 (62)                               | 62                                  |
| 8.   | Practical guide to support bereaved families                         | 0 (0)                                   | 7.0 (4)                              | 93.0 (53)                              | 57                                  |
| 9.   | Helpful phrases and questions                                        | 0 (0)                                   | 13.0 (7)                             | 87.0 (47)                              | 54                                  |
| 10.  | What do people bereaved by suicide find helpful                      | 0 (0)                                   | 3.4 (2)                              | 96.6 (57)                              | 59                                  |
| 11.  | Key resources for parents bereaved by suicide                        | 0 (0)                                   | 0 (0)                                | 100 (60)                               | 60                                  |
| 12.  | Bereaved mother – example consultation                               | 3.3 (2)                                 | 0 (0)                                | 96.7 (58)                              | 60                                  |
| 13.  | Bereaved father – example consultation                               | 3.4 (2)                                 | 0 (0)                                | 96.6 (57)                              | 59                                  |
| 14.  | Action planning                                                      | 2.0 (1)                                 | 4.1 (2)                              | 93.9 (46)                              | 49                                  |
